# Supplementary material for: Identification of SYK inhibitor, R406 as a novel senolytic agent
Source: publisher site journal article supplement (doi:10.18632/aging.103135), 2020-05-07
Supplement: Supplementary file [file aging-v12i9-103135-supplementary-material-SD2.pdf]

## SUPPLEMENTARY TABLE

Supplementary Table 1. HTS results for selecting compounds that induce cytotoxicity or ROS levels in senescent HDFs.

| Low proliferation   |                |                 | High ROS level      |                |                 |
|---------------------|----------------|-----------------|---------------------|----------------|-----------------|
| Cell and drug conc. | HGPS 5 $\mu$ M | HDF 0.5 $\mu$ M | Cell and drug conc. | HGPS 5 $\mu$ M | HDF 0.5 $\mu$ M |
| Drug name           | ROS level      | Proliferation   | Drug name           | ROS level      | Proliferation   |
| OSI-027             | 0.94           | 0.686           | Afatinib            | 2.25           | 0.838           |
| Saracatinib         | 0.9            | 0.658           | Dovitinib           | 2.48           | 0.908           |
| SGI-1776 free base  | 1.24           | 0.657           | Ponatinib           | 2.49           | 1.672           |
| WYE-125132          | 1.16           | 0.653           | CCT129202           | 3.64           | 1.267           |
| PD184352            | 1.4            | 0.649           | AZD5438             | 2.42           | 0.839           |
| Bosutinib           | 1.66           | 0.648           | IKK-16              | 2.37           | 0.886           |
| Selumetinib         | 1.05           | 0.603           | AZD3463             | 3.35           | 1.235           |
|                     |                |                 | GZD824              | 2.22           | 1.274           |
|                     |                |                 | BIO                 | 2.38           | 0.882           |

  

| Low proliferation and Low ROS level |                |                 | Low proliferation and High ROS level |                |                 |
|-------------------------------------|----------------|-----------------|--------------------------------------|----------------|-----------------|
| Cell and drug conc.                 | HGPS 5 $\mu$ M | HDF 0.5 $\mu$ M | Cell and drug conc.                  | HGPS 5 $\mu$ M | HDF 0.5 $\mu$ M |
| Drug name                           | ROS level      | Proliferation   | Drug name                            | ROS level      | Proliferation   |
| LY2784544                           | 0.88           | 0.678           | Nintedanib                           | 2.04           | 0.680           |
| NVP-BHG712                          | 0.75           | 0.677           | Axitinib                             | 2.1            | 0.619           |
| R406 (Tamatinib)                    | 0.81           | 0.645           |                                      |                |                 |
